# Supplementary material
Source: PubMed Central journal article supplement (PMC2984153)
Supplement: 1013758107_pnas.201013758SI.pdf [file 1013758107_pnas.201013758SI.pdf]

# Supporting Information

Donnelly et al. 10.1073/pnas.1013758107

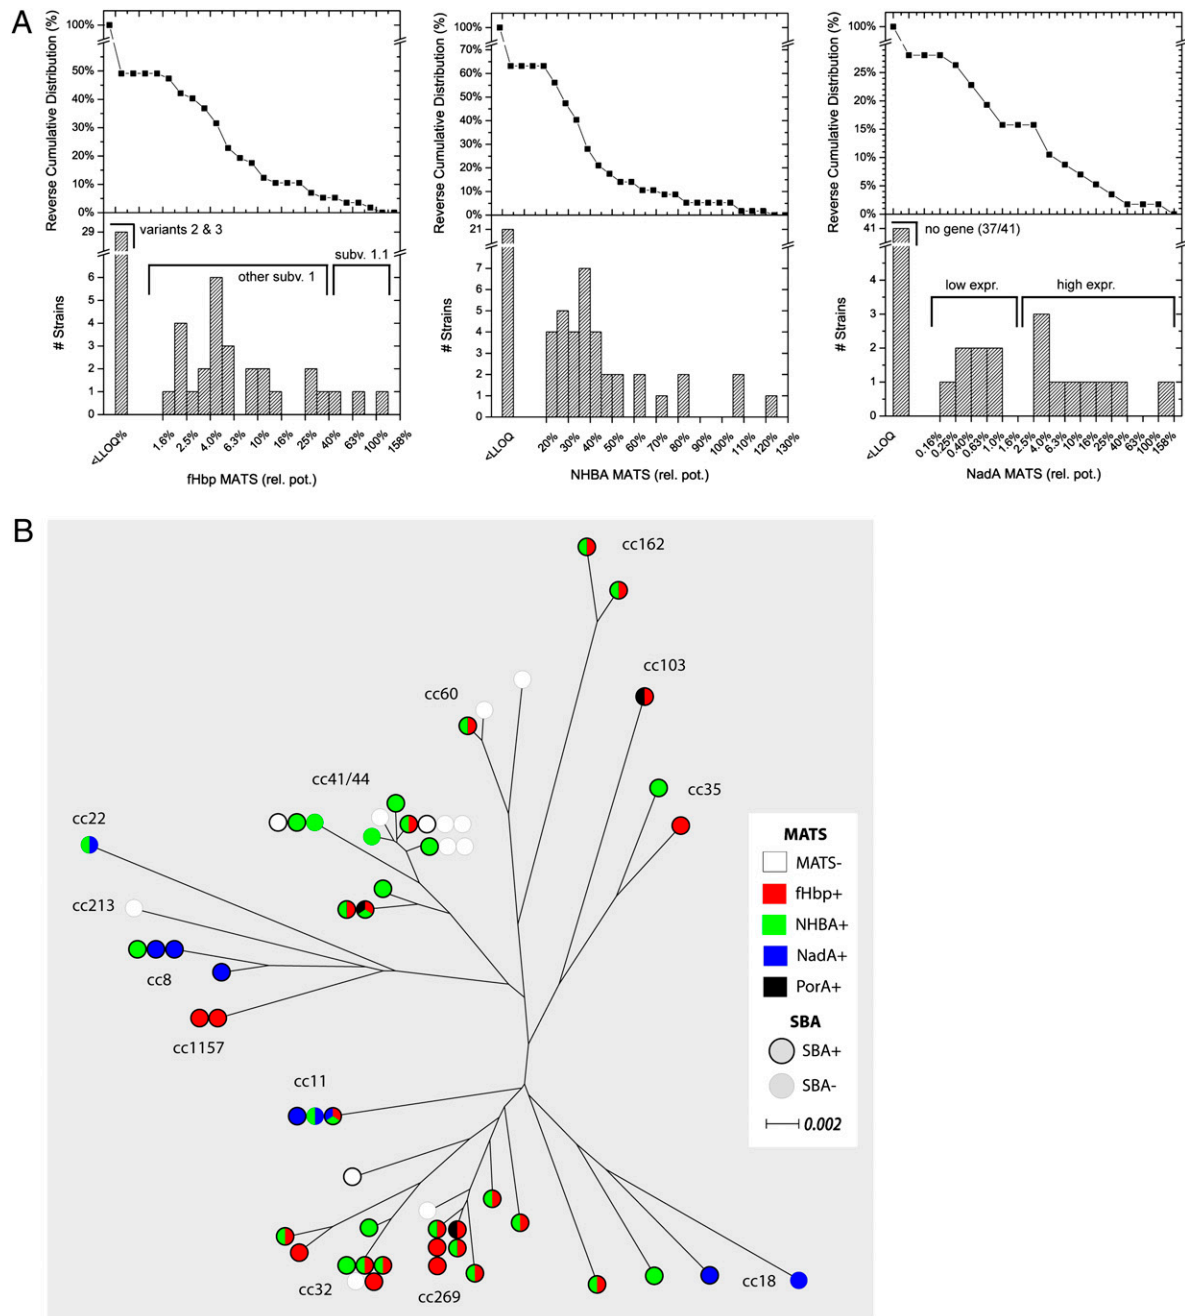

**Fig. S1.** MATS relative potencies and SBA results with pooled infant sera for the subset of 57 MenB strains. (A) Frequency distribution of antigen relative potency (RP) of NHBA, NadA, and fHbp antigens in 57 selected serogroup B strains. (Upper) Reverse cumulative distributions of the proportion of strains with antigen RP greater than the values indicated on the x axis. (Lower) Histograms of frequency distribution of strains with different values of antigen RP. As in Fig. 2A, antigen RP is shown of different strains for fHbp. Genetic variants (major variants denoted by 1, 2, or 3 and subvariants denoted by decimals) of fHbp are indicated by brackets. As in Fig. 2B, antigen relative potencies are shown of different strains for NHBA. As in Fig. 2C, antigen relative potencies are shown of different strains for NadA. Brackets denote strains with low and high expression of NadA. Eighty-eight percent of the strains not quantifiable by the test are PCR negative for the NadA gene. RP, relative potency for each antigen determined by MATS in comparison with the reference strains H44/76 (fHbp), 5/99 (NadA), and NGH38 (NHBA). LLOQ, lower limit of quantitation, lowest antigen RP values with between-assay CV  $\leq 25\%$ . (B) MLST-based phylogenetic reconstruction of the 124 strains that were MATS typed in this study. Color coding shows antigens at or above the PBT. Strains killed in the SBA with postimmune serum from adult vaccinees are coded by a thick black border. Major clonal complexes are indicated with the founder ST. The phylogenetic tree was obtained with the Neighbor program from the PHYLIP package, with branch lengths computed from the Kimura two-parameter distances.

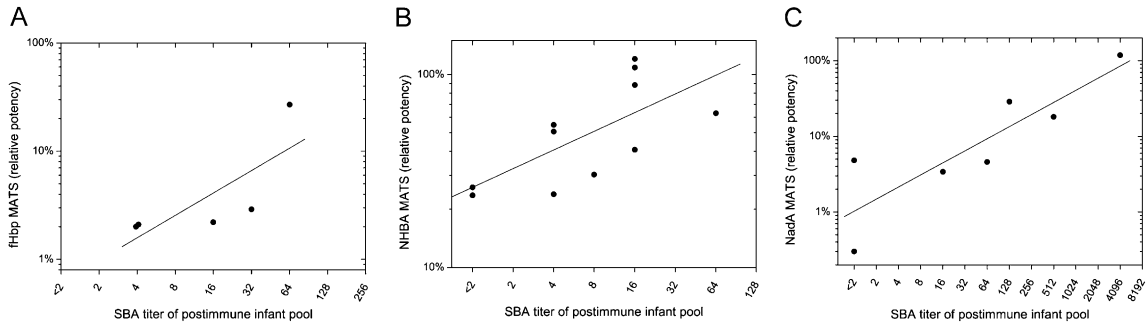

**Fig. S2.** MATS relative potency vs. SBA titer in pooled postbooster sera from children immunized at 2, 4, and 6 mo of age and boosted at 12 mo. Selected subsets of strains (denoted by solid circles) with fHbp ( $n = 5$ ) (A), NHBA ( $n = 11$ ) (B), or NadA ( $n = 7$ ) (C) above the lower limit of quantitation (LLOQ) and all others below the LLOQ were evaluated for SBA activity and MATS relative potency. The regression line (–) was obtained from log-transformed data by the least-squares method; Pearson's product-moment correlation coefficient  $r^2 = 0.58, 0.47,$  and  $0.75$  for fHbp, NHBA, and NadA, respectively. Spearman's non-parametric rank correlations coefficients were  $0.97$  ( $P = 0.005$ ),  $0.75$  ( $P = 0.008$ ), and  $0.81$  ( $P = 0.027$ ) for fHbp, NHBA, and NadA, respectively.

Table S1. *Neisseria meningitidis* group B strains used

| Strain      | Strain characterization |      |      |         |                       |              |         |                  |
|-------------|-------------------------|------|------|---------|-----------------------|--------------|---------|------------------|
|             | CC                      | ST   | Year | Country | Serotype/sero-subtype | fHbp variant |         | <i>nadA</i> gene |
|             |                         |      |      |         |                       | Old          | New     |                  |
| 96217       | 8                       | 153  | 1996 | CAN     | B:2b:P1.5,2           | 2.1          | 2.p0016 | +                |
| 5/99        | 8                       | 1349 | 1999 | N       | B:2b:P1.5,2           | 2.8          | 2.p0023 | +                |
| M01-0240988 | 213                     | 213  | 2001 | U.K.    | B:1:P1.22,14          | 3.3          | 3.p0030 | +                |
| 8047        | 11                      | 11   | 1978 | USA     | B:2:P1.2              | 2.18         | 2.p0059 | +                |
| B3937       | 18                      | New  | 1995 | D       | B:22:P1.16            | 2.2          | 2.p0017 | +                |
| M10525      | 60                      | 6148 | 2003 | USA     | B:ND:P1.5-1,2         | 2.8          | 2.p0023 | (-)              |
| M10994      | 41/44                   | 44   | 2003 | USA     | B:ND:P1.21,16         | 2.4          | 2.p0019 | (-)              |
| M1239       | 41/44                   | 437  | 1994 | USA     | B:14:P1.23,14         | 3.1          | 3.p0028 | (-)              |
| M14815      | 32                      | 32   | 2006 | USA     | B:ND:P1.7,16          | 3.3          | 3.p0030 | +                |
| M3153       | 41/44                   | 5906 | 1996 | USA     | B:4,7:P1.7-1,1        | 2.4          | 2.p0019 | (-)              |
| M3369       | Ua                      | 1576 | 1997 | USA     | B:10:P1.19,15         | 3.4          | 3.p0031 | (-)              |
| M4458       | 22                      | new  | 1998 | USA     | B:NT:P1.3             | 2.10         | 2.p0025 | +                |
| H44/76      | 32                      | 32   | 1976 | N       | B:15:P1.7,16          | 1.1          | 1.p0001 | (-)              |
| NMB         | 8                       | 1380 | 1968 | USA     | B:2b:P1.5,2           | 2.1          | 2.p0016 | +                |
| M14296      | 162                     | 162  | 2005 | USA     | B:ND:P1.22,14         | 1.p0180      | 1.p0180 | (-)              |
| M16019      | 32                      | 32   | 2007 | USA     | B:ND:P1.7,16          | 1.1          | 1.p0001 | +                |
| M15563      | 162                     | 162  | 2006 | USA     | B:ND:P1.22,14         | 1.9-3        | 1.p0013 | (-)              |
| M01-0240364 | 11                      | 11   | 2001 | U.K.    | B:2a:P1.5,2           | 3.4          | 3.p0031 | +                |
| M01-0240660 | 269                     | 1049 | 2001 | U.K.    | B:NT:P1.19,15         | 1.11         | 1.p0015 | (-)              |
| ISS1104     | 32                      | 32   | 2000 | I       | B:15:P1.7,16          | 1.1          | 1.p0001 | +                |
| M10574      | 32                      | 803  | 2003 | USA     | B:ND:P1.7-2,13-1      | 3.15         | 3.p0061 | +                |
| M10837      | 41/44                   | 409  | 2003 | USA     | B:ND:P1.18-1,34-2     | 2.4          | 2.p0019 | (-)              |
| M14459      | Ua                      | 2048 | 2005 | USA     | B:ND:P1.22,9          | 1.p0180      | 1.p0180 | (-)              |
| M18483      | 103                     | 103  | 2008 | USA     | B:ND:P1.7-2,4         | 1.9-2        | 1.p0012 | (-)              |
| NZ98/254    | 41/44                   | 42   | 1998 | NZ      | B:4:P1.7-2,4          | 1.10         | 1.p0014 | (-)              |
| M11048      | 60                      | 60   | 2003 | USA     | B:ND:P1.5-1,2-2       | 1.9-3        | 1.p0013 | (-)              |
| M18632      | 1157                    | 1157 | 2008 | USA     | B:ND:P1.5-1,9         | 1.9-3        | 1.p0013 | +                |
| M4030       | Ua                      | 178  | 1993 | USA     | B:17:P1.19,15         | 1.9-2        | 1.p0012 | (-)              |
| M01-0240500 | 269                     | 269  | 2001 | U.K.    | B:NT:P1.7,4           | 1.11         | 1.p0015 | (-)              |
| M01-0240993 | 11                      | 11   | 2001 | U.K.    | B:2a:P1.5-1,10-8      | 1.9-1        | 1.p0011 | +                |
| LNP19324    | 32                      | 33   | 1998 | F       | B:2b:P1.5,2           | 1.14         | 1.p0041 | +                |
| M13202      | 41/44                   | 1194 | 2004 | USA     | B:ND:P1.18-1,3        | 1.4          | 1.p0004 | (-)              |
| M14933      | 32                      | 32   | 2006 | USA     | B:ND:P1.22,14         | 3.15         | 3.p0061 | +                |
| M15295      | 32                      | 34   | 2006 | USA     | B:ND:P1.19,15         | 1.p0196      | 1.p0196 | +                |
| M16686      | 41/44                   | 2487 | 2007 | USA     | B:ND:P1.7-1,1         | 1.9-3        | 1.p0013 | (-)              |
| M18133      | 41/44                   | 41   | 2008 | USA     | B:ND:P1.22,14         | 1.4          | 1.p0004 | (-)              |
| M18339      | 1157                    | 1157 | 2008 | USA     | B:ND:P1.22,14-6       | 1.9-3        | 1.p0013 | +                |
| M01-0240185 | 11                      | 11   | 2001 | U.K.    | B:2a:P1.5,10          | 1.9          | 1.p0010 | (-)              |
| M01-0240889 | 269                     | 1214 | 2001 | U.K.    | B:NT:P1.5,10          | 1.11         | 1.p0015 | (-)              |
| M10713      | 41/44                   | 136  | 2003 | USA     | B:ND:P1.17,16-3       | 2.9          | 2.p0024 | (-)              |
| 961-5945    | 8                       | 153  | 1996 | AUS     | B:2b:P1.21,16         | 2.1          | 2.p0016 | +                |
| ISS1026     | 41/44                   | 44   | 2000 | I       | B:4:P1.13             | 1.10         | 1.p0014 | (-)              |
| LNP17094    | 8                       | 153  | 1999 | F       | B:2b:P1.10            | 2.1          | 2.p0016 | +                |
| M10566      | 41/44                   | 437  | 2003 | USA     | B:ND:P1.22-1,14       | 2.4          | 2.p0019 | (-)              |
| M12886      | Ua                      | 6147 | 2004 | USA     | B:ND:P1.22-15,28-2    | 1.4          | 1.p0004 | (-)              |
| M13032      | 162                     | 753  | 2004 | USA     | B:ND:P1.22,14         | 1.23         | 1.p0065 | (-)              |
| M14879      | 1157                    | 1157 | 2006 | USA     | B:ND:P1.22,14-6       | 1.9-3        | 1.p0013 | +                |
| M14882      | 41/44                   | 44   | 2006 | USA     | B:ND:P1.7-1,1         | 2.4          | 2.p0019 | (-)              |
| M2937       | 35                      | new  | 1996 | USA     | B:4,7:P1.23,14        | 1.7          | 1.p0007 | (-)              |
| M3812       | 60                      | 60   | 1997 | USA     | B:NT:P1.5-1,10-4      | 1.9-2        | 1.p0012 | (-)              |
| M4407       | 41/44                   | new  | 1996 | USA     | B:NT:P1.15            | 2.4          | 2.p0019 | (-)              |
| NGH38       | Ua                      | 36   | 1988 | N       | B:NT:P1.3             | 2.9          | 2.p0024 | (-)              |
| NM117       | 269                     | 1195 | 1998 | U.K.    | B:21:P1.9             | 1.11         | 1.p0015 | (-)              |
| M01-0240101 | 269                     | 1049 | 2001 | U.K.    | B:NT:P1.19,15         | 1.11         | 1.p0015 | (-)              |
| M15978      | 60                      | 60   | 2007 | USA     | B:ND:P1.5,2           | 1.9-3        | 1.p0013 | (-)              |
| M01-0240443 | 269                     | 269  | 2001 | U.K.    | B:NT:P1.5,2           | 1.11         | 1.p0015 | (-)              |
| M12898      | 35                      | 457  | 2004 | USA     | B:ND:P1.5-1,2-2       | 2.1          | 2.p0016 | (-)              |
| M16405      | 41/44                   | 136  | 2007 | USA     | B:ND:P1.7-2,13-1      | 2.p0218      | 2.p0218 | (-)              |
| M11822      | 41/44                   | 2331 | 2004 | USA     | B:ND:P1.22-1,14       | 2.4          | 2.p0019 | (-)              |
| M12425      | 41/44                   | 44   | 2004 | USA     | B:ND:P1.7-1,1         | 1.33         | 1.p0083 | (-)              |

Table S1. Cont.

|             | Strain characterization |      |      |         |                       |              |         |                  |
|-------------|-------------------------|------|------|---------|-----------------------|--------------|---------|------------------|
|             | CC                      | ST   | Year | Country | Serotype/sero-subtype | fHbp variant |         | <i>nadA</i> gene |
| M15009      | 41/44                   | 136  | 2006 | USA     | B:ND:P1.17,16-3       | 2.9          | 2.p0024 | (-)              |
| M17632      | 41/44                   | 437  | 2008 | USA     | B:ND:P1.22-1,14       | 2.4          | 2.p0019 | (-)              |
| U.K.200     | 269                     | 275  | 2001 | U.K.    | B:NT:P1.22,9          | 1.9-3        | 1.p0013 | (-)              |
| 035-0658    | 32                      | 1364 | —    | USA     | B:3:P1.7-2,13-1       | 2.8          | 2.p0023 | +                |
| 035-0673    | 32                      | 1364 | —    | USA     | B:3:P1.7-2,13-1       | 2.8          | 2.p0023 | +                |
| 1000        | 18                      | 20   | 1988 | RUS     | B:NT:P1.5,10-4        | 2.10         | 2.p0025 | (-)              |
| 2996        | 8                       | 540  | 1975 | U.K.    | B:2b:P1.5,2           | 2.1          | 2.p0016 | +                |
| 67/00       | 41/44                   | 1127 | 2000 | N       | B:4,7:NST             | 1.10         | 1.p0014 | (-)              |
| 72/00       | 32                      | 1346 | 2000 | N       | B:15:P1.7,13          | 1.1          | 1.p0001 | +                |
| 95N477      | 11                      | 475  | 1995 | AUS     | B:2a:P1.2             | 2.7          | 2.p0022 | (-)              |
| 972-0319    | 41/44                   | 158  | 1997 | AUS     | B:NT:P1.4             | 1.10         | 1.p0014 | (-)              |
| BZ198       | 41/44                   | 41   | 1986 | NL      | B:NT:P1.7-2,4         | 1.10         | 1.p0014 | (-)              |
| BZ232       | 37                      | 38   | 1964 | NL      | B:NT:P1.2             | 2.9          | 2.p0024 | (-)              |
| CU385       | 32                      | 33   | 1980 | C       | B:4:P1.15             | 1.1          | 1.p0001 | +                |
| D8221       | 231                     | 2744 | 2002 | D       | B:NT:P1.5,10-1        | 2.9          | 2.p0024 | (-)              |
| ISS1102     | 41/44                   | 2916 | 2000 | I       | B:15:P1.4             | 1.10         | 1.p0014 | (-)              |
| ISS1106     | 41/44                   | 42   | 2000 | I       | B:4:P1.4              | 1.10         | 1.p0014 | (-)              |
| ISS749      | 41/44                   | 1127 | 1996 | I       | B:14:P1.13            | 1.10         | 1.p0014 | (-)              |
| ISS832      | 32                      | 32   | 1997 | I       | B:15:P1.7,16-6        | 1.1          | 1.p0001 | +                |
| LNP20404    | 32                      | 800  | 2003 | F       | B:14:P1.7,16          | 1.1          | 1.p0001 | +                |
| M0579       | 41/44                   | 43   | 1993 | USA     | B:ND:P1.5,2           | 2.5          | 2.p0020 | (-)              |
| M10549      | 35                      | 457  | 2003 | USA     | B:ND:P1.22-1,14       | 2.1          | 2.p0016 | (-)              |
| M11003      | 41/44                   | 5097 | 2003 | USA     | B:ND:P1.7-2,4         | 1.4          | 1.p0004 | (-)              |
| M11053      | 269                     | 275  | 2003 | USA     | B:ND:P1.22,9          | 2.4          | 2.p0019 | (-)              |
| M11095      | 41/44                   | 136  | 2003 | USA     | B:ND:P1.18-1,3        | 2.9          | 2.p0024 | (-)              |
| M11204      | 41/44                   | 5109 | 2003 | USA     | B:ND:P1.7-1,1         | 2.4          | 2.p0019 | (-)              |
| M11295      | 32                      | 32   | 2003 | USA     | B:ND:P1.7,16          | 1.1          | 1.p0001 | +                |
| M11906      | 41/44                   | 44   | 2004 | USA     | B:ND:P1.7-1,1         | 1.33         | 1.p0083 | (-)              |
| M12502      | 162                     | 162  | 2004 | USA     | B:ND:P1.22,14         | 1.9-3        | 1.p0013 | (-)              |
| M12550      | 41/44                   | 4682 | 2004 | USA     | B:ND:P1.22-1,14       | 1.9-3        | 1.p0013 | (-)              |
| M12566      | 41/44                   | 5111 | 2004 | USA     | B:ND:P1.21,16         | 2.4          | 2.p0019 | (-)              |
| M13203      | 41/44                   | 44   | 2005 | USA     | B:ND:P1.7-1,1         | 2.4          | 2.p0019 | (-)              |
| M1390       | 41/44                   | 41   | 1995 | USA     | B:15:B1.7,4           | 1.10         | 1.p0014 | (-)              |
| M14549      | 103                     | 6063 | 2005 | USA     | B:ND:P1.17,16-3       | 2.10         | 2.p0025 | (-)              |
| M14613      | 162                     | 162  | 2005 | USA     | B:ND:P1.22,14         | 3.4          | 3.p0031 | (-)              |
| M15083      | Ua                      | 2048 | 2005 | USA     | B:ND:P1.12-1,16-8     | 2.27         | 2.p0078 | (-)              |
| M15085      | 41/44                   | 5839 | 2006 | USA     | B:ND:P1.7-2,4         | 1.4          | 1.p0004 | (-)              |
| M15564      | 32                      | 32   | 2006 | USA     | B:ND:P1.7,16          | 1.1          | 1.p0001 | +                |
| M16683      | 41/44                   | 437  | 2007 | USA     | B:ND:5-1,2-2          | 2.4          | 2.p0019 | (-)              |
| M1820       | 60                      | 60   | 1995 | USA     | B:NT:P1.5,2           | 1.9-3        | 1.p0013 | (-)              |
| M2441       | 269                     | 96   | 1996 | USA     | B:NT:P1.12            | 3.4          | 3.p0031 | (-)              |
| M2552       | 103                     | 103  | 1996 | USA     | B:NT:P1.18-1,3        | 2.10         | 2.p0025 | (-)              |
| M2934       | 32                      | 32   | 1996 | USA     | B:15:P1.7,16          | 1.1          | 1.p0001 | +                |
| M3279       | 41/44                   | 136  | 1997 | USA     | B:7:P1.17,16-3        | 2.9          | 2.p0024 | (-)              |
| M4105       | 41/44                   | 154  | 1996 | USA     | B:4,7:P1.7,4          | 1.4          | 1.p0004 | (-)              |
| M4215       | 32                      | 32   | 1996 | USA     | B:15:P1.7,16          | 1.1          | 1.p0001 | +                |
| M4287       | 41/44                   | 44   | 1996 | USA     | B:NT:P1.7,1           | 2.4          | 2.p0019 | (-)              |
| M4717       | 41/44                   | New  | 1998 | USA     | B:14:P1.4             | 1.10         | 1.p0014 | (-)              |
| M5149       | 23                      | 2421 | 1998 | USA     | B:2c:P1.5,2           | 2.10         | 2.p0025 | (-)              |
| M5258       | 37                      | 916  | 1998 | USA     | B:NT:1.5,2            | 2.9          | 2.p0024 | (-)              |
| M6094       | 41/44                   | 40   | 1999 | USA     | B:4,7:P1.7,13         | 1.10         | 1.p0014 | (-)              |
| M6208       | 103                     | 2006 | 1999 | USA     | B:NT:P1.5-1,10-4      | 2.10         | 2.p0025 | (-)              |
| M986        | 11                      | 11   | 1963 | USA     | B:2a:P1.5,2           | 2.7          | 2.p0022 | +                |
| MC58        | 32                      | 74   | 1985 | U.K.    | B:15:P1.7,16b         | 1.1          | 1.p0001 | +                |
| NGP165      | 11                      | 11   | 1974 | N       | B:NT:P1.2             | 3.2          | 3.p0029 | +                |
| NM008       | 41/44                   | 41   | 1995 | U.K.    | B:4:P1.4              | 1.4          | 1.p0004 | (-)              |
| NM066       | 32                      | 74   | 1997 | U.K.    | B:15:P1.7,16          | 1.1          | 1.p0001 | +                |
| NM092       | 41/44                   | 41   | 1997 | U.K.    | B:4:P1.4              | 1.4          | 1.p0004 | (-)              |
| SWZ107      | 35                      | 35   | 1986 | CH      | B:4:P1.2              | 2.1          | 2.p0016 | (-)              |
| M01-0240013 | 269                     | 275  | 2001 | U.K.    | B:NT:P1.22,9          | 2.4          | 2.p0019 | (-)              |
| M01-0240149 | 41/44                   | 41   | 2001 | U.K.    | B:4:P1.7,4            | 1.4          | 1.p0004 | (-)              |

Table S1. Cont.

|                    | Strain characterization |     |      |         |                       |              |         |           |
|--------------------|-------------------------|-----|------|---------|-----------------------|--------------|---------|-----------|
|                    | CC                      | ST  | Year | Country | Serotype/sero-subtype | fHbp variant |         | nadA gene |
| <b>M00-0243291</b> | 11                      | 11  | 2000 | U.K.    | B:2a:P1.5,10          | 1.9          | 1.p0010 | (-)       |
| <b>M01-0240345</b> | 60                      | 60  | 2001 | U.K.    | B:NT:P1.21,16         | 1.9-3        | 1.p0013 | (-)       |
| <b>M01-0240355</b> | 213                     | 213 | 2001 | U.K.    | B:1:P1.22,14          | 3.4          | 3.p0031 | +         |

Strain names in bold were tested in SBA with pooled sera from infant and adults. Strain names in regular type were tested with pooled sera from adults only. Ua, unassigned. Country abbreviations: AUS, Australia; C, Cuba; CAN, Canada; CH, Switzerland, D, Germany; F, France; I, Italy; N, Norway; NL, Netherlands; RUS, Russia; U.K., United Kingdom; USA, United States; CC, clonal complex; ST, sequence type.

Table S2. Comparison of different monoclonal and polyclonal antibodies for detection of different subvariants of fHbp by MATS

| Strain    | 741 subvariant | Immunized adults<br>(rec MenB proteins only x3):<br>SBA GMT post 3 | Detection of fHbp in MATS (% Bmax) |          |          |         |
|-----------|----------------|--------------------------------------------------------------------|------------------------------------|----------|----------|---------|
|           |                |                                                                    | Rabbit polyclonal                  | mAb JAR1 | mAb JAR5 | mAb 502 |
| H44/76    | 1.1            | 73                                                                 | 100                                | 100      | 100      | 100     |
| M1390     | 1.14           | 37                                                                 | 15                                 | 0        | 39       | 0       |
| MC58      | 1.1            | 35                                                                 | 100                                | 100      | 100      | 100     |
| M3812     | 1.12           | 35                                                                 | 12                                 | 5        | 19       | 0       |
| NZ98/ 254 | 1.14           | 13                                                                 | 13                                 | 0        | 33       | 0       |
| M6190     | 1.6            | 5                                                                  | 4                                  | 0        | 0        | 0       |

Rabbit polyclonal antiserum and three different fHbp-specific monoclonal antibodies were compared for their ability to detect different subvariants of fHbp in MATS relative to SBA on serum from human vaccinees. The rabbit polyclonal and the monoclonals JAR1 and 502 were bactericidal whereas JAR5 was not (1). MATS results were analyzed by an earlier version of the method in which the sample OD was expressed as a proportion of the OD of the H44/76 reference strain by a linear fit instead of the five-parameter logistic curve. Adult human subjects ( $n = 14$ ) were immunized three times with recombinant MenB proteins only (without OMV) and were tested in SBA with human complement against the MenB strains listed. Although the pattern of reactivity of JAR5 was close to that of the polyclonal antiserum, the individual monoclonal antibodies failed to detect one or more subvariants of fHbp that were detected by the polyclonal rabbit serum and were found on strains that were killed in the SBA.

1. Welsch JA, et al. (2004) Protective activity of monoclonal antibodies to genome-derived neisserial antigen 1870, a *Neisseria meningitidis* candidate vaccine. *J Immunol* 172:5606–5615.

Table S3. Characterization of the MATS assay

|                                                                                                                      | fHbp       | NHBA         | NadA       |
|----------------------------------------------------------------------------------------------------------------------|------------|--------------|------------|
| Acceptance criteria for regression of the reference curve, regression of the unknown curve, and parallelism analysis | $P > 0.01$ | $P > 0.0001$ | $P > 0.05$ |
| Lower limit of quantitation (LLOQ)                                                                                   | 1.67%      | 20.2%        | 0.17%      |
| Intermediate precision (% CV)                                                                                        | 20%        | 27%          | 34%        |
| Accuracy (relative bias)                                                                                             | -1.8%      | -1.7%        | -1.4%      |

Eighteen strains, covering the whole range of MATS relative potency for the three antigens, were tested 6–10 times in different days and by different operators. Analysis of the statistical reports produced by StatLIA for single experiments led to the definition of acceptance criteria for the three main data reduction steps: regression of the five-parameters logistic curve (5-PL) to reference strain optical density, regression of the 5-PL to unknown strain optical density, and test for parallelism of the two 5-PL curves. StatLIA produces for each step a single  $P$  value, based on a collection of historical experiments and on Monte Carlo simulations. In the first row are reported the limiting values for these  $P$  values: if an assay produces a  $P$  value lower than the values reported, it is rejected. Acceptable results were then analyzed to determine the coefficient of variation (% CV) for each strain/antigen. Values of % CV were found to be relatively stable for high, medium, and low values of the relative potency, but below a certain value % CV was found to increase significantly to values  $>50\%$ . These values were defined as the lower limit of quantitation (LLOQ) for the assay and are reported in the second row. The intermediate precision of the assay, for each antigen, was defined as the highest % CV measured for the strain with mean relative potency above the LLOQ and is reported in the third row. Accuracy of the assay was determined as the relative bias comparing the relative potency determined for the reference strains compared with themselves. The relative bias was calculated as  $100 \cdot \left( \frac{\text{Relative Potency}}{100} - 1 \right) \%$ , and results are reported in the bottom row.
